# Supplementary material for: Chimeric Vaccines Designed by Immunoinformatics-Activated Polyfunctional and Memory T cells that Trigger Protection against Experimental Visceral Leishmaniasis
Source: MDPI journal article supplement (doi:10.3390/vaccines8020252), 2020-05-27
Supplement: s1 [file s1]

Review

# Covid-19 Pandemic: What Changes for Dentists and Oral Medicine Experts? A Narrative Review and Novel Approaches to Infection Containment

Maria Eleonora Bizzoca <sup>1</sup>, Giuseppina Campisi <sup>2</sup> and Lorenzo Lo Muzio <sup>1,3,\*</sup>

<sup>1</sup> Department of Clinical and Experimental Medicine, University of Foggia, 71121 Foggia, Italy; marielebizzoca@gmail.com

<sup>2</sup> Department of Surgical, Oncological and Oral Sciences (Di.Chir.On.S.), University of Palermo, 90121 Palermo, Italy; campisi@odonto.unipa.it

<sup>3</sup> C.I.N.B.O. (Consorzio Interuniversitario Nazionale per la Bio-Oncologia), 66100 Chieti, Italy;

\* Correspondence: lorenzo.lomuzio@unifg.it

Received: 3 May 2020; Accepted: 23 May 2020; Published: 27 May 2020

## Chimera A

| H2A       |                 | LiP2a            |           | LiP0              |           | H2A       |                 | LiP2a            |           | LiP0              |           | LACK            |           |           |                 | CPC       |           |           |           |                 |           |           |                 |
|-----------|-----------------|------------------|-----------|-------------------|-----------|-----------|-----------------|------------------|-----------|-------------------|-----------|-----------------|-----------|-----------|-----------------|-----------|-----------|-----------|-----------|-----------------|-----------|-----------|-----------------|
| KKRCRLNPR | DDISSLLKNVTLSHS | AAKVISAMPAASSGAA | MSTKYLAAY | VDAFNLLAVSVATSYEF | AHRVKAPAR | KKRCRLNPR | DDISSLLKNVTLSHS | AAKVISAMPAASSGAA | MSTKYLAAY | VDAFNLLAVSVATSYEF | AHRVKAPAR | DRSIRMWDLRNGQCQ | WSADGNTLY | ATERSLSVY | DRSIRMWDLRNGQCQ | WSADGNTLY | ATERSLSVY | GYLYSGKSL | WTASADNGY | LVKYKGGTYSYVKGE | GYLYSGKSL | WTASADNGY | LVKYKGGTYSYVKGE |

## Chimera B

| CPA             |           |           |                 |           |           | CPB       |                 |           |           |                 |           | PSA-50S         |           |           |                 |           |           | A2        |                 |           |           |                 |           |
|-----------------|-----------|-----------|-----------------|-----------|-----------|-----------|-----------------|-----------|-----------|-----------------|-----------|-----------------|-----------|-----------|-----------------|-----------|-----------|-----------|-----------------|-----------|-----------|-----------------|-----------|
| RPDFMNMTPRGVPLE | AKRRRLPTT | MTEDYMGMY | RPDFMNMTPRGVPLE | AKRRRLPTT | MTEDYMGMY | SKKFSHPSL | AGALVMGTALLTESA | RTDRQSCLY | SKKFSHPSL | AGALVMGTALLTESA | RTDRQSCLY | DSWSRQLGLTSLTSL | LPPEWAAMP | LTDERTCLV | DSWSRQLGLTSLTSL | LPPEWAAMP | LTDERTCLV | GKGLRAPPL | GPHLRGGAVTSSVVT | SQAGDVFAL | GKGLRAPPL | GPHLRGGAVTSSVVT | SQAGDVFAL |

GPGPG linker

**Figure S1.** Illustration of the Chimera’s constructions. The multi-epitope vaccine sequence consisting of 24 MHC class I and II ligands. GPGPG sequence was used as linker to join the epitopes. H2A= Histone protein 2, LiP2a = Acid ribosomal protein P2, LiP0 = Acid ribosomal protein P0, LACK = *Leishmania* homologue of activated C kinase, CPC = Cysteine peptidase C, CPA = Cysteine peptidase A, CPB = Cysteine peptidase B, PSA-50S = Surface antigenic protein, A2 = Amastigote protein A2

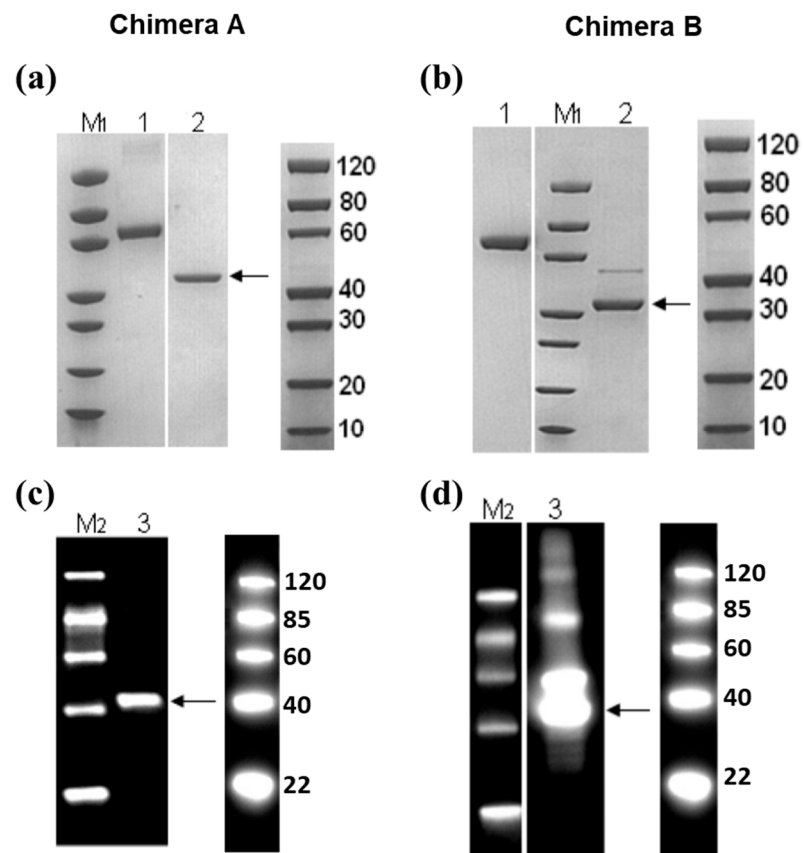

**Figure S2.** Evaluation of the expression of chimeric proteins A and B in the *E. coli* system. The expression was confirmed by SDS-PAGE as described in (a) and (b) for Chimeras A and B respectively. M1 = protein marker 1 (120 to 10 kDa); 1 = Bovine Serum Albumin (2 µg); 2 = 2 µg of chimeric protein A (~40 kDa) or B (~38 kDa). Also, the expression of the Chimera A (c) and Chimera B (d) was confirmed by Western Blot using anti-His antibody. M2 = protein marker 2 (120 to 22 kDa); 3 = 2 µg of chimeric protein A (c) and B (d).

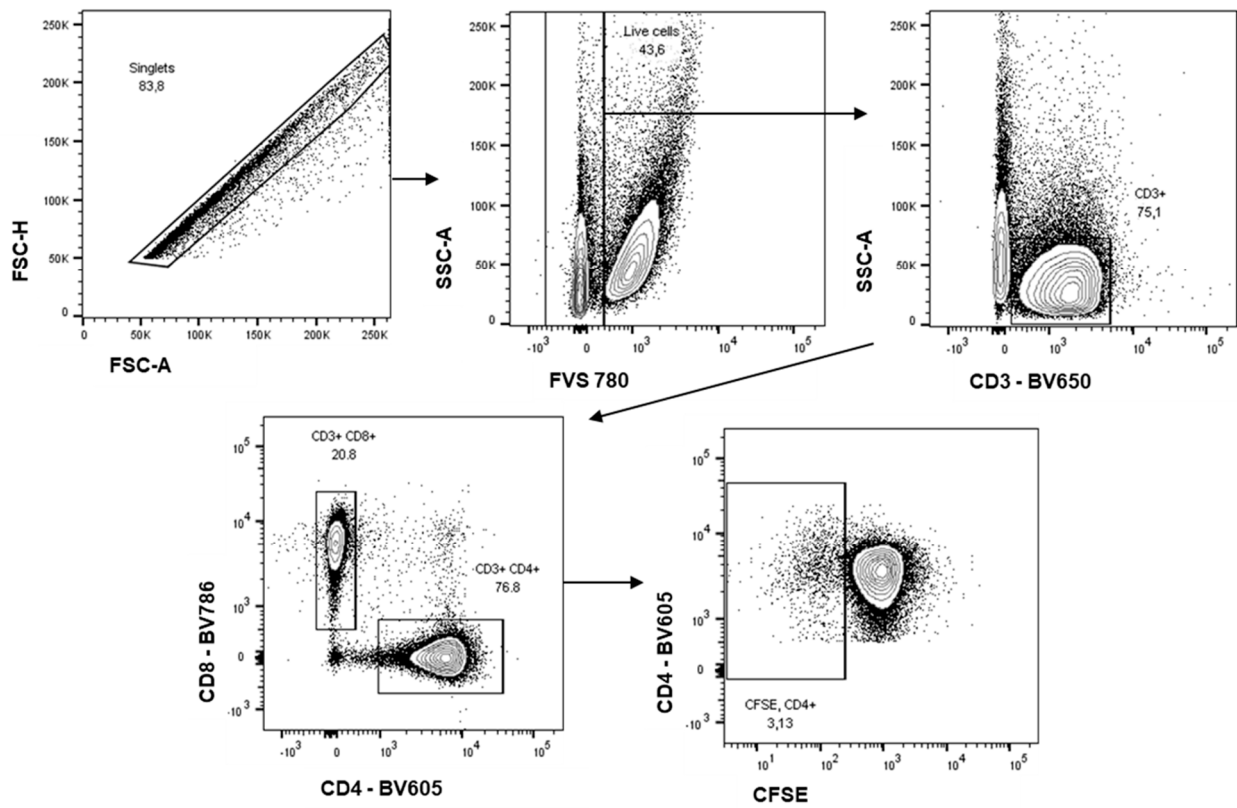

**Figure S3.** Representative plot of the gating strategy for CFSE-labelled cells to evaluate the proliferation of splenocytes. The first step was to select the single cells, then the live cells using (FVS780). To characterize the T-lymphocytes anti-CD3, anti-CD4 and anti-CD8 were used followed by the proliferation analyses selecting the CFSE<sup>low</sup>-labelled cells.
